# Supplementary material
Source: Springer Nature journal article supplement (https://www.springermedizin.de/resource/supplementary/12874_2011_791_MOESM1_ESM.pdf/9432956)
Supplement: MOESM1 [file 9432956]

Children selected in WA Aboriginal Child Health Survey sample  
n = 5,289

```
graph TD; A[Children selected in WA Aboriginal Child Health Survey sample  
n = 5,289] --> B[Available for record linkage  
n = 4,830]; A --> C[Not available  
Born outside WA n = 264  
Consent not given n = 195]; B --> D[Not linked  
n = 193]; B --> E[Linked to birth/midwives record  
n=4,637]; E --> F[Primary carer is not birth mother  
n=817]; E --> G[Primary carer is birth mother  
n=3,820];
```

Available for  
record linkage  
n = 4,830

Not available  
Born outside WA n = 264  
Consent not given n = 195

Not linked  
n = 193

Linked to  
birth/midwives  
record  
n=4,637

Primary  
carer is not  
birth mother  
n=817

Primary  
carer is  
birth mother  
n=3,820

Children selected in WA Aboriginal Child Health Survey sample  
n = 5,289

```
graph TD; A[Children selected in WA Aboriginal Child Health Survey sample  
n = 5,289] --> B[Available for record linkage  
n = 4,830]; A --> C[Not available  
Born outside WA n = 264  
Consent not given n = 195]; B --> D[Not linked  
n = 193]; B --> E[Linked to birth/midwives record  
n=4,637]; E --> F[Primary carer is not birth mother  
n=817]; E --> G[Primary carer is birth mother  
n=3,820];
```

Available for  
record linkage  
n = 4,830

Not available  
Born outside WA n = 264  
Consent not given n = 195

Not linked  
n = 193

Linked to  
birth/midwives  
record  
n=4,637

Primary  
carer is not  
birth mother  
n=817

Primary  
carer is  
birth mother  
n=3,820
